# Expression and Localization of Mitochondrial Ferritin mRNA in Alzheimer's Disease Cerebral Cortex

Ligang Wang<sup>1,2</sup>, Hongkuan Yang<sup>2</sup>, Shiguang Zhao<sup>2\*,9</sup>, Haruhisa Sato<sup>3</sup>, Yoshihiro Konishi<sup>4</sup>, Thomas G. Beach<sup>5</sup>, Essam Mohamed Abdelalim<sup>1</sup>, Naomi J. Bisem<sup>1</sup>, Ikuo Tooyama<sup>1\*,9</sup>

**1** Molecular Neuroscience Research Center, Shiga University of Medical Science, Otsu, Japan, **2** Department of Neurosurgery, 1st Affiliated Hospital, Harbin Medical University, Harbin, China, **3** Department of Pathology, Marutamachi Hospital, Kyoto, Japan, **4** Department of Clinical Research, Nishi-tottori National Hospital, Tottori, Japan, **5** Civin Laboratory for Neuropathology, Banner Sun City, Arizona, United States of America

## Abstract

Mitochondrial ferritin (MtF) has been identified as a novel ferritin encoded by an intron-lacking gene with specific mitochondrial localization located on chromosome 5q23.1. MtF has been associated with neurodegenerative disorders such as Friedreich ataxia and restless leg syndrome. However, little information is available about MtF in Alzheimer's disease (AD). In this study, therefore, we investigated the expression and localization of MtF messenger RNA (mRNA) in the cerebral cortex of AD and control cases using real-time polymerase chain reaction (PCR) as well as *in situ* hybridization histochemistry. We also examined protein expression using western-blot assay. In addition, we used *in vitro* methods to further explore the effect of oxidative stress and  $\beta$ -amyloid peptide (A $\beta$ ) on MtF expression. To do this we examined MtF mRNA and protein expression changes in the human neuroblastoma cell line, IMR-32, after treatment with A $\beta$ , H<sub>2</sub>O<sub>2</sub>, or both. The neuroprotective effect of MtF on oxidative stress induced by H<sub>2</sub>O<sub>2</sub> was measured by MTT assay. The *in situ* hybridization studies revealed that MtF mRNA was detected mainly in neurons to a lesser degree in glial cells in the cerebral cortex. The staining intensity and the number of positive cells were increased in the cerebral cortex of AD patients. Real-time PCR and western-blot confirmed that MtF expression levels in the cerebral cortex were significantly higher in AD cases than that in control cases at both the mRNA and the protein level. Cell culture experiments demonstrated that the expression of both MtF mRNA and protein were increased by treatment with H<sub>2</sub>O<sub>2</sub> or a combination of A $\beta$  and H<sub>2</sub>O<sub>2</sub>, but not with A $\beta$  alone. Finally, MtF expression showed a significant neuroprotective effect against H<sub>2</sub>O<sub>2</sub>-induced oxidative stress ( $p < 0.05$ ). The present study suggests that MtF is involved in the pathology of AD and may play a neuroprotective role against oxidative stress.

**Citation:** Wang L, Yang H, Zhao S, Sato H, Konishi Y, et al. (2011) Expression and Localization of Mitochondrial Ferritin mRNA in Alzheimer's Disease Cerebral Cortex. PLoS ONE 6(7): e22325. doi:10.1371/journal.pone.0022325

**Editor:** Ashley I. Bush, Mental Health Research Institute of Victoria, Australia

**Received:** January 19, 2011; **Accepted:** June 24, 2011; **Published:** July 20, 2011

**Copyright:** © 2011 Wang et al. This is an open-access article distributed under the terms of the Creative Commons Attribution License, which permits unrestricted use, distribution, and reproduction in any medium, provided the original author and source are credited.

**Funding:** This study was supported in part by the JST Practical Application Research Program and by JSPS KAKENHI (22300153). The Brain and Body Donation Program is supported by the National Institute on Aging (P30 AG19610 Arizona Alzheimer's Disease Core Center), the Arizona Department of Health Services (contract 211002, Arizona Alzheimer's Research Center), the Arizona Biomedical Research Commission (contracts 4001, 0011, 05-901 and 1001 to the Arizona Parkinson's Disease Consortium) and the Michael J. Fox Foundation for Parkinson's Research. The funders had no role in study design, data collection and analysis, decision to publish, or preparation of the manuscript.

**Competing Interests:** The authors have declared that no competing interests exist.

\* E-mail: kinchan@belle.shiga-med.ac.jp (IT); guangsz@hotmail.com (SZ)

<sup>9</sup> These authors contributed equally to this work.

## Introduction

We and others have previously shown that iron and iron regulatory proteins are involved in the pathology of Alzheimer's disease (AD). Postmortem examinations of human brain tissue have demonstrated that iron concentrations are increased in the brains of AD patients compared to controls [1,2,3]. Iron [1,4,5] and iron regulatory proteins such as ferritin [3], transferrin [3,6], melanotransferrin [6] and lactoferrin [7,8] have been detected in senile plaques and/or neurofibrillary tangles, reportedly major sites for catalytic redox activity [9]. Excessive iron deposition may generate some of the oxidative stress known to occur in AD [4,9,10,11,12].

Mitochondria have a key role in iron metabolism because they are involved in synthesizing heme and various iron-sulfur (Fe-S) cluster-containing proteins [13,14]. The last step in heme biosynthesis, the

insertion of Fe<sup>2+</sup> into protoporphyrin IX by ferrochelatase, occurs in the mitochondrial matrix [13]. Mitochondrial iron levels must be well regulated because an inadequate supply of iron would impair the metabolic and respiratory activities of the organelle [14,15,16], while excess "free" iron in mitochondria would promote the generation of harmful reactive oxygen species which may cause diseases such as sideroblastic anemia [15].

Recently, mitochondrial ferritin (MtF) has been identified as a novel ferritin encoded by an intronless gene on chromosome 5q23.1. This gene product has been localized to the mitochondria in humans [17]. MtF is expressed as a 30-kDa precursor that is targeted to mitochondria by a positively charged leader sequence. Proteolysis of the N-terminal leader sequence within the mitochondria forms a 22-kDa MtF subunit, which has high-sequence homology to H-type ferritin, including conservation of the ferroxidase center and activity [18,19]. MtF has been detected

at very low levels in iron storage organs such as the liver and spleen, but levels are high in the testes in which mitochondria are abundant [19,20]. The distribution pattern of MtF suggests that MtF may play an important role in mitochondrial function.

The function of MtF has not been elucidated. However, several studies have implicated MtF in a number of neurological disorders such as Friedreich ataxia [21] and restless legs syndrome [22]. Although abnormalities of mitochondrial function and iron metabolism have been reported in AD, little information is available about MtF in the brains of AD patients. In this study, therefore, we investigated the expression and localization of MtF messenger RNA (mRNA) in the cerebral cortex of AD and control cases using real-time polymerase chain reaction (PCR) and *in situ* hybridization histochemistry. We also examined MtF protein expression in AD patient brain tissues using a western-blot assay. In addition, we examined the effect of  $\beta$ -amyloid peptide (A $\beta$  1–42) and H<sub>2</sub>O<sub>2</sub> treatments on the expression of MtF mRNA and protein in a human neuroblastoma cell line, IMR-32. The neuroprotective effect of MtF against oxidative stress induced by H<sub>2</sub>O<sub>2</sub> was also examined.

## Materials and Methods

### Ethics statements

Human brain tissues were obtained from the Brain Donation Program at the Banner Sun Health Research Institute [23]. Written informed consent was obtained from all donors or their legal representatives. The Brain Donation Program has been approved by the Institutional Review Board of the Banner Health Corporation. The study was also approved by the ethics committee at Shiga University of Medical Science.

### Brain samples

Total RNA and protein were purified from the temporal cortex and cerebellum of eight sporadic AD cases (mean age  $\pm$  S.D., 82.3 $\pm$ 9.2 years) and eight control cases without neurological disease (mean age  $\pm$  S.D., 85.1 $\pm$ 9.7 years). Brain tissue from another three AD cases (mean age  $\pm$  S.D., 83.3 $\pm$ 3.8 years) and three control cases (mean age  $\pm$  S.D., 73.7 $\pm$ 13.0 years) were used for *in situ* hybridization. For Western blots, brain tissue from three AD cases (mean age  $\pm$  S.D., 80.7 $\pm$ 9.0 years) and three control cases (mean age  $\pm$  S.D., 79.0 $\pm$ 7.1 years) was used. The average postmortem delay for the AD and control cases was 2.62 and 2.71 hours, respectively.

### *In situ* hybridization

Human MtF cDNA was obtained from the plasmid, pCMV6-XL5 (OriGene Technologies, Inc., Rockville, MD). The entire MtF coding region was inserted into the pGEM-T Easy vector (Promega, Madison, WI, USA) by PCR using the following primers: 5'-GAACAGGACGACTGGGAAAGCG-3'; and 5'-AGAGCGTGCAATCCAGCAACG-3'. After linearization with *SacII* and *SalI*, digoxigenin-UTP labeled sense and antisense riboprobes were transcribed using SP6 and T7 RNA polymerases according to the manufacturer's protocols. The riboprobes were subsequently purified by ethanol precipitation.

*In situ* hybridization was used to examine MtF mRNA expression in the temporal cortices from three AD cases and three control cases. The tissue was processed following previously described methods [24,25,26]. Sections were treated for 10 min at room temperature with 10  $\mu$ g/ml proteinase K in 10 mM Tris-HCl buffer (pH 8.0) containing 150 mM NaCl at 37°C, and then post-fixed with 4% paraformaldehyde in 0.1 M PBS at room temperature for 10 min. Sections were pre-hybridized for 2 h at 37°C in

hybridization buffer (50% formamide, 5 x Denhardt's solution, 3 x saline/sodium citrate (SSC; 1x: 150 mM NaCl and 15 mM sodium citrate), 0.5 mg/ml yeast tRNA (Gibco BRL), and 0.5 mg/ml heat-denatured salmon sperm DNA (Wako Pure Chemicals Co., Osaka, Japan). Probes were diluted in hybridization buffer to a final concentration of 2  $\mu$ g/ml and hybridized for 16 h at 60°C. After hybridization, the sections were washed briefly in pre-warmed 3 x SSC at 60°C, then rinsed for 2 h in pre-warmed 0.2 x SSC buffer at 60°C. Sections were then rinsed for 5 min in NT buffer (0.1 M Tris HCl, pH 7.5 and 150 mM NaCl) at room temperature. Sections were blocked in 1% skim milk in NT buffer for 60 min, and incubated overnight at 4°C with alkaline phosphatase-labeled anti-digoxigenin antibody (1:200; Roche Diagnostics, Basel, Switzerland). After washing with NT buffer, signal was detected using the substrates nitroblue tetrazolium chloride (NBT) and 5-bromo-4-chloro-3-indolylphosphate p-toluidine salt (BCIP).

### Preparation of A $\beta$ oligomers

We used A $\beta$ -derived diffuse ligands (ADDLs) as typical A $\beta$  oligomers. ADDLs are a mixture of A $\beta$  oligomers including SDS-resistant 3–24 mers of A $\beta$  [27,28,29,30,31]. ADDLs are widely used for AD research as they display neurotoxicity and have been detected in the cerebrospinal fluid of Alzheimer's patients [32].

A $\beta$  oligomers were prepared as described previously [33,34]. Briefly, synthetic A $\beta$  1–42 peptide (Peptide Institute, Osaka, Japan) was dissolved in HFIP to 1 mM and incubated for 1 hour at 37°C. After incubating on ice for 15 min, the HFIP was then removed by evaporation and the resulting peptide was stored at –20°C. Before use, the peptide film was re-suspended to 5 mM in dimethyl sulfoxide (DMSO) [35] followed by sonication for 15 min. A $\beta$  1–42 oligomers were prepared by diluting the solution in DMEM/Phenol Red-free Ham's F-12 medium without glutamine to a final concentration of 100  $\mu$ M and then incubating for 24 h at 4°C [36]. The preparation was centrifuged at 16,000 $\times$ g for 10 min at 4°C to remove insoluble aggregates, and the supernatant containing soluble oligomers was transferred into clean tubes. These preparations were used directly for cell treatments. The concentration of A $\beta$  oligomers was determined using a Bio-Rad protein dye assay reagent (Hercules, CA, USA). A final concentration of 15  $\mu$ M was used for cell treatment. Formation of A $\beta$  oligomers was determined by silver staining and examination by electron microscope.

### Silver staining of A $\beta$ oligomers

Samples were diluted at 1:2 with Tricine sample buffer (Bio-rad Laboratories, Hercules, CA) and were not heated before loading. Five microliters of each sample was run on a 15–20% precast polyacrylamide Tris-Tricine gel (Supersep Tricine gel; Wako, Osaka, Japan). After electrophoresis, the gel was stained using a silver staining kit (Nacalai Inc., Osaka, Japan).

### Electron microscopy examination for A $\beta$ oligomer formation

Two microliters of each sample was adsorbed onto a carbon- and Formvar-coated copper grid (200-mesh) by floating on a drop of sample solution. After washing with distilled water, the sample on the grid was negatively stained with 2% aqueous uranyl acetate, and then dried. Samples were then observed under a transmission electron microscope (H-7600; Hitachi, Japan) at 80 kV.

### Cell culture and treatment with ADDL, H<sub>2</sub>O<sub>2</sub> and peroxynitrite

A human neuroblastoma cell line (IMR-32, purchased from ATCC, CRL-2468, Manassas, VA, USA) was used in this study.

Cells were prepared in modified Eagles medium (MEM) supplemented with 10% fetal bovine serum (FBS), 1% Sodium pyruvate (Sigma, St. Louis, MO, USA), 1% L-glutamine (Sigma, St. Louis, MO, USA) and 1% penicillin/streptomycin (Nacalai Inc., Osaka, Japan) at 37°C in a humidified atmosphere of 5% CO<sub>2</sub> and 95% air.

Three different treatments were investigated using IMR-32 cells cultured in 12-well plates: 1) treatment with 15 μM Aβ oligomers for 24 h; 2) treatment with 300 μM hydrogen peroxide H<sub>2</sub>O<sub>2</sub>, diluted from 30% hydrogen peroxide solution (Santoku Chemical Industries Co., LTD, Japan), for 30 min; 3) treatment with both 15 μM Aβ and 300 μM H<sub>2</sub>O<sub>2</sub>, and, 4) treatment with 10 μM peroxyntirite (WAKENYAKU Co., LTD, Japan) for 24 hours as a second method of inducing oxidative stress [37]. Peroxyntirite concentration was determined spectrophotometrically at 302 nm in 0.1 M NaOH ( $\epsilon_{302\text{ nm}} = 1670/\text{M per cm}$ ). Decomposed peroxyntirite was obtained by incubating peroxyntirite in complete medium for 30 min at room temperature. For a negative control, cells were treated with an equal amount of DMSO to that used during preparation of the Aβ oligomers. Cells were subsequently incubated for a further 18 h before being assessed for viability or other end point measures. All experiments were performed in triplicate.

### Real-time PCR for human AD brain and *in vitro* experiments

MtF mRNA was detected by real-time PCR using a Light Cycler system (Roche Diagnostics K.K., Tokyo, Japan). The sense primer was 5'-GCTCTATGCGTCCTACGTGTA CTTGT-3', and the antisense primer was 5'-TCCTGTTCCGGCTTCTTGAT-3'. Real-time PCR analysis for β-actin mRNA was also employed to assess the variability of mRNA content. The results were analyzed using the LightCycler Software second derivative maximum method (Roche Diagnostics). Relative quantification of mRNA was performed based on fluorescence measurements in comparison with a standard curve that was generated during the course of each PCR run: values were normalized to the β-actin mRNA levels in each sample. All experiments were performed independently at least three times. For the *in vitro* experiments, the detection of MtF mRNA expression by real-time PCR was the same as for the human AD brain real-time PCR assay as described above. Statistical significance was assessed using the one-way ANOVA test. Significance was set at  $p < 0.05$ .

### Western-blot analysis of MtF

Human brain samples for western-blot were collected and treated as previously described [8]. Cells were lysed with RIPA buffer (50 mM Tris [tris (hydroxymethyl) aminomethane]-HCl, 150 mM NaCl, 1% Nonidet P-40, 0.5% sodium deoxycholate, and 0.1% sodium dodecyl sulfate [SDS]). Protein content was determined using the Bio-Rad protein dye assay reagent (Hercules, CA, USA). Lysates containing equal amounts of protein were heated for 3 min at 95°C in Laemmli loading buffer and resolved by SDS-polyacrylamide gel electrophoresis (SDS-PAGE). They were then transferred to a polyvinylidene difluoride membrane (Immobilon-P, Nippon Millipore Ltd., Tokyo, Japan). BioRad molecular weight markers (Precision Plus, Nippon BioRad Laboratories, Tokyo, Japan) were used. The blots were blocked by incubation for 1 hour with 5% nonfat milk in Tris-buffered saline (TBS) containing 0.1% Tween 20 (TBST) and were hybridized overnight at 4°C with anti-MtF rabbit polyclonal IgG 1:1000 (A93251Hu, Uscn, Wuhan, China), or anti-actin mouse monoclonal IgG 1:1000 (MAB1501, Chemicon International Inc., Billerica, MA, USA). After washing 3 times for 10 minutes each

with TBST, the blots were incubated for 1 hour with horseradish peroxidase-linked anti-rabbit IgG 1:10,000 (ImmunoPure, Pierce, Rockford, USA). After extensive washing with 25 mM TBST, labeling was visualized by chemiluminescence using ECL western blotting detection reagents (SuperSignal West Pico, Thermo Scientific, Rockford, IL).

### Transfecting the MtF-expressing plasmid into IMR-32 cells

The entire coding region of MtF was subcloned into the pGEM-T Easy vector as mentioned above. This produced a plasmid containing a 768-bp fragment which encompassed the entire human MtF sequence, and included a *SaI* site at the 5' end and a *SacII* site downstream of the stop codon at the 3' end of the MtF gene. The 768-bp *SaI/SacII* insert was excised and subcloned into the *SaI/SacII* site of the pEGFP-N1 expression vector (CLONTECH Laboratories, Inc., Palo Alto, CA). Correct constructs were confirmed by sequencing.

IMR-32 cells were transiently transfected with the expression construct using the FuGENE HD transfection reagent (Roche Diagnostics, Mannheim, Germany). Briefly,  $5 \times 10^5$  or  $1 \times 10^4$  cells were plated on 60 mm dishes or on 96-well plates respectively and transfected according to the manufacturer's instructions. Cells were maintained in modified Eagles medium (MEM) supplemented with 10% fetal bovine serum (FBS), 1% Sodium pyruvate (Sigma, St. Louis, MO, USA), 1% L-glutamine (Sigma, St. Louis, MO, USA) in a humidified atmosphere (5% CO<sub>2</sub>, 95% air) at 37°C. Experiments were performed 24 h after transfection and protein expression after transfection was detected using western-blotting.

### Assessment of cell viability

Culture cells were transfected as described above. Twenty-four hours after transfection, the medium was replaced with fresh medium with or without 300 μM H<sub>2</sub>O<sub>2</sub> and incubated for 30 min. Cells were subsequently incubated in fresh medium for a further 18 h before being assessed for viability. Cell viability was measured by MTT assay. Briefly, MTT (500 μg/ml, Bioassay Systems, Hayward, CA, USA) was added to each well and incubated for 4 h at 37°C. The medium was aspirated and cells were lysed with DMSO. The absorbance at 570 nm was measured with a TECAN infinite M200 microplate reader (TECAN, Austria). Each experiment was repeated three times. Statistical significance was assessed using the one-way ANOVA test. Significance was set at  $p < 0.05$ .

## Results

### *In situ* hybridization histochemistry

Figure 1 shows the results of *in situ* hybridization histochemistry in the temporal cortex of a control (Fig. 1A, B, C) and an Alzheimer (Fig. 1D, E, F) case. Positive signals for MtF mRNA were detected in both control (Fig. 1A) and AD (Fig. 1D) cases using the antisense probe. At a high magnification, positive signals were localized predominantly in neurons (Fig. 1E). The staining intensity in MtF-positive neurons was increased in AD cases (Fig. 1E) compared to controls (Fig. 1B). The sense probe did not generate any signal (Fig. 1C and F).

### Real-time PCR analysis using total RNA from human brain

Real-time PCR was used to compare the expression levels of MtF mRNA between AD and control cases (Fig. 2). When normalized to β-actin, the mean expression levels of MtF mRNA in temporal cortex of control and AD cases were  $0.023 \pm 0.003$

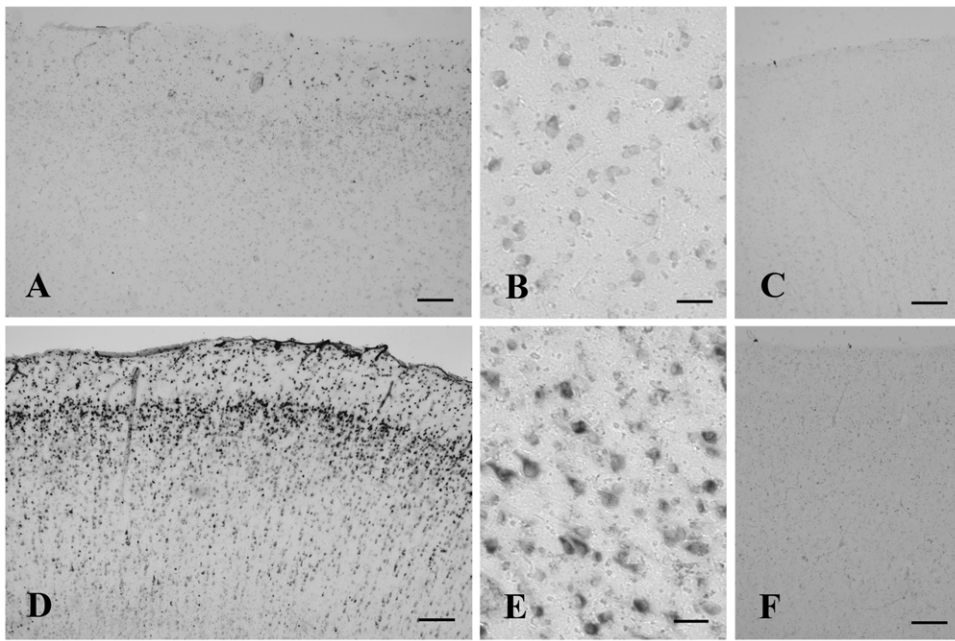

**Figure 1. *In situ* hybridization histochemistry of the cerebral cortex of control (A–C) and Alzheimer's disease (AD) cases (D–F) using antisense (A, B, D, E) and sense (C, F) probes.** Mitochondrial ferritin mRNA localizes mainly in neurons. Both the number and intensity of positive neurons increase in AD cases (D) compared to controls (A). Using sense probes (C and F), no signals are detected in the cortex. Bars = 200  $\mu$ m in A, C, D, F, and 50  $\mu$ m in B, E.  
doi:10.1371/journal.pone.0022325.g001

(mean  $\pm$  SEM,  $n = 8$ ) and  $0.075 \pm 0.009$  (mean  $\pm$  SEM,  $n = 8$ ), respectively. The mean expression levels of MtF mRNA in the cerebellum of control and AD cases were  $0.024 \pm 0.008$  (mean  $\pm$  SEM,  $n = 8$ ) and  $0.039 \pm 0.002$  (mean  $\pm$  SEM,  $n = 8$ ), respectively. MtF mRNA levels in AD temporal cortices were significantly increased to 326% of control levels ( $P < 0.01$ ). There was no significant difference in MtF expression in the cerebellum between AD cases and controls.

#### Determination of A $\beta$ oligomer formation

Supernatant proteins were separated on a Tris tricine gel using SDS-PAGE and visualized with a silver stain. SDS-PAGE analysis of oligomeric preparations before the 24-h incubation period showed no oligomeric species except for monomers (Fig. 3A; 0 h). After the 24-h incubation period, high molecular weight species between 17 and 25 kDa were apparent (Fig. 3A; 24 h). In these images, the uniform gray background is due to the silver staining process.

In addition, small and sparsely distributed spherical structures were detected by EM analysis after the 24-h incubation period (arrowheads in Fig. 3B).

#### Real-time PCR analysis using total RNA from culture cells

Figure 4 A shows the results of real-time PCR analysis of MtF mRNA using total RNA from cultured cells in the H<sub>2</sub>O<sub>2</sub> treatment group, the A $\beta$  treatment group, the H<sub>2</sub>O<sub>2</sub> plus A $\beta$  treatment group, as well as the two control groups: DMSO treated and untreated cells. The MtF mRNA expression level was not changed by A $\beta$  treatment but was significantly increased by H<sub>2</sub>O<sub>2</sub> treatment ( $P < 0.01$ ). The results indicate that oxidative stress induces MtF expression in IMR32 cells. When A $\beta$  neurotoxicity was added to oxidative stress, the expression of MtF mRNA was significantly accelerated. The MtF mRNA expression level in the combination group was the highest of all five groups ( $p < 0.01$

compared to control groups and  $p < 0.05$  compared to H<sub>2</sub>O<sub>2</sub> treatment). DMSO treated groups showed no significant change in MtF expression.

Figure 4 B shows the results of real-time PCR analysis of MtF mRNA using total RNA from cultured cells in the peroxynitrite

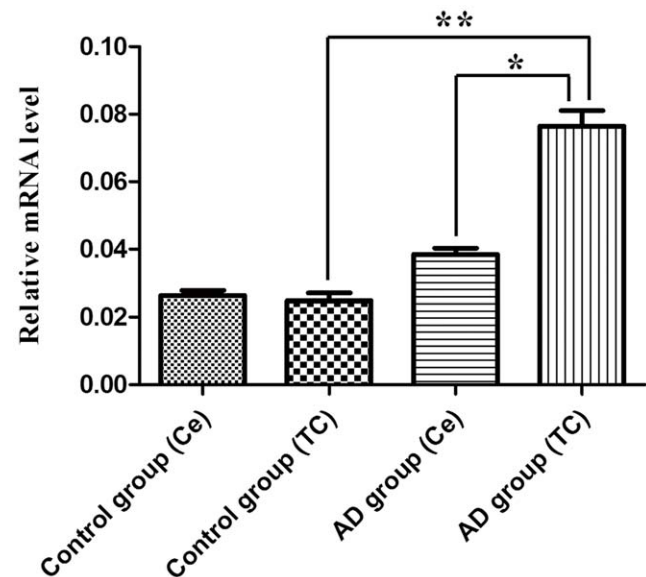

**Figure 2. The expression levels of mitochondrial ferritin mRNA in the cerebral cortex of control and Alzheimer's disease (AD) patients and control cases.** The expression in the temporal cortex (TC) of AD patients is significantly higher compared to that in control cases and cerebellum (Ce). Asterisk indicates significantly different to control (\* $p < 0.05$ ; \*\* $p < 0.01$ ).  
doi:10.1371/journal.pone.0022325.g002

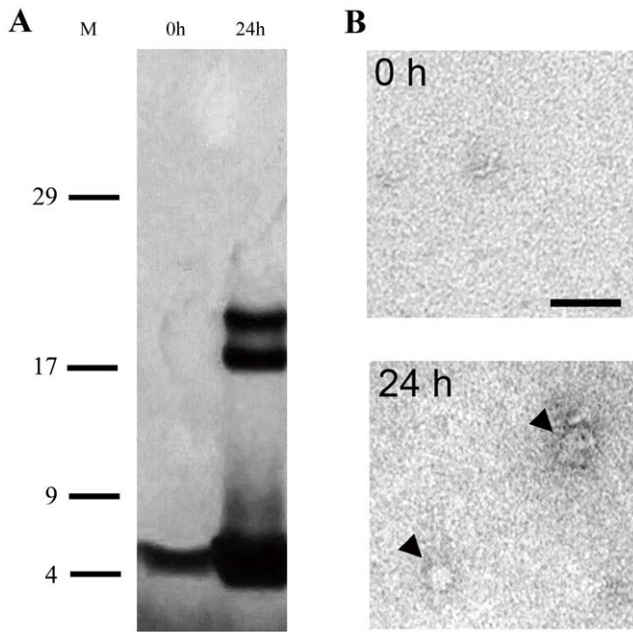

**Figure 3. Formation of oligomeric A $\beta$ 1-42 assemblies.** (A) Profiles of A $\beta$ 1-42 oligomers before (0 h) and after 24-h incubation (24 h) on SDS-PAGE followed by silver staining. M: Molecular weight markers. 0 h: A $\beta$ 1-42 preparation 0 h at 4°C. 24 h: Initial ADDL preparation 24 h later at 4°C. (B) Electrophoretic pattern of A $\beta$ 1-42 oligomeric preparations separated with centrifugal filters before electrophoresis. Representative photographs showing A $\beta$ 1-42 preparations before (0 h) and after incubation (24 h). Arrowheads in B indicate A $\beta$ 1-42 oligomers. Scale bar: 50 nm. doi:10.1371/journal.pone.0022325.g003

treatment group and the control groups. The MtF mRNA expression level was not changed significantly by peroxynitrite treatment. Neither the NaOH vehicle (0.3 M) nor the peroxyni-

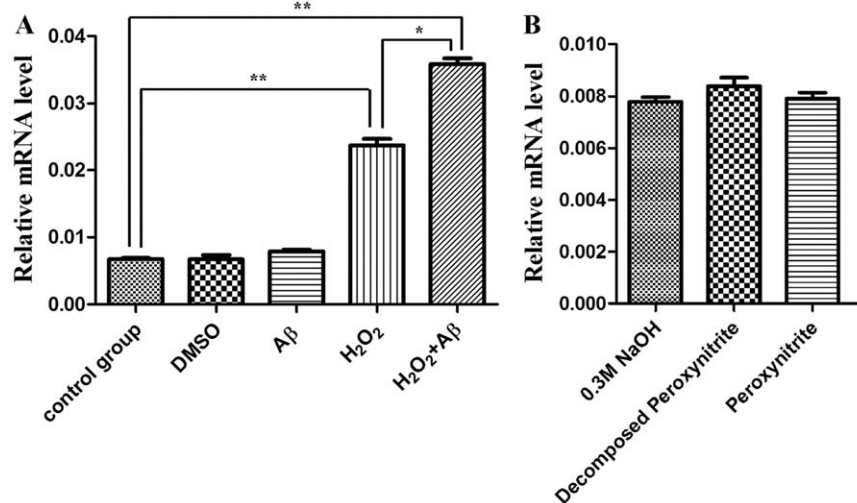

**Figure 4. Mitochondrial ferritin mRNA expression levels in cultured cells.** (A) Compared to the control, the MtF mRNA expression level is significantly high after H<sub>2</sub>O<sub>2</sub> treatment but not after treatment with A $\beta$  or DMSO. The group treated with both of H<sub>2</sub>O<sub>2</sub> and A $\beta$  displays the highest level of MtF mRNA expression among all groups. Asterisks and double asterisks indicate  $p < 0.05$  and  $p < 0.01$ , respectively. (B) Results of real-time PCR analysis of MtF mRNA using total RNA from cultured cells in the peroxynitrite treatment group and the control groups. The MtF mRNA expression level was not changed significantly by peroxynitrite treatment. doi:10.1371/journal.pone.0022325.g004

trite decomposition products had a significant effect on MtF mRNA expression.

### Western blotting analysis of MtF

Figure 5 shows a western-blot analysis of MtF expression in human brain. The expression levels of MtF in the temporal cortex of AD patients (Fig. 5 A, A) are higher than in control cases ( $p < 0.05$ , Fig. 5 A, C).

Figure 6 shows the western-blot analysis of MtF protein expression in the H<sub>2</sub>O<sub>2</sub> treatment group, the A $\beta$  treatment group, the H<sub>2</sub>O<sub>2</sub> plus A $\beta$  treatment group, as well as the two control groups: DMSO treated and untreated cells. MtF protein expression after treatment with H<sub>2</sub>O<sub>2</sub> or a combination of A $\beta$  and H<sub>2</sub>O<sub>2</sub> was significantly higher than in control groups. The combination group showed the highest MtF protein expression level of all groups. However, single treatment with A $\beta$  or DMSO caused no significant effect on MtF protein expression. These results are in accordance with the real-time PCR results.

### MtF expression significantly rescues cell death after H<sub>2</sub>O<sub>2</sub> treatment

In order to investigate the possible roles of MtF in neuroprotection, wild type IMR-32 cells (IMR-32), empty vector transfectants (vector-IMR-32) and MtF transfectants (MtF-IMR-32) were incubated with or without 300  $\mu$ M H<sub>2</sub>O<sub>2</sub> for 30 min. Figures 7A and B show the results of cell viability and western blots of MtF, respectively. Similar to previous reports [15,17,18], an MtF protein band with an apparent molecular mass of 22 kDa was detected by SDS-PAGE. Weak bands were detected in IMR-32 and vector-IMR-32 cells (Fig. 7B). A remarkable decrease in the viability of IMR-32 and Vector-IMR-32 cells (about 50%;  $p < 0.01$ , compared with the control groups) was observed after treatment with 300  $\mu$ M H<sub>2</sub>O<sub>2</sub> for 30 min (Fig. 7A). The viability of MtF-IMR-32 cells decreased about 30% after H<sub>2</sub>O<sub>2</sub> treatment, therefore cell viability was much higher than in control groups ( $p < 0.05$ ). These results show that overexpression of MtF reduces the rate of cell death after H<sub>2</sub>O<sub>2</sub> treatment.



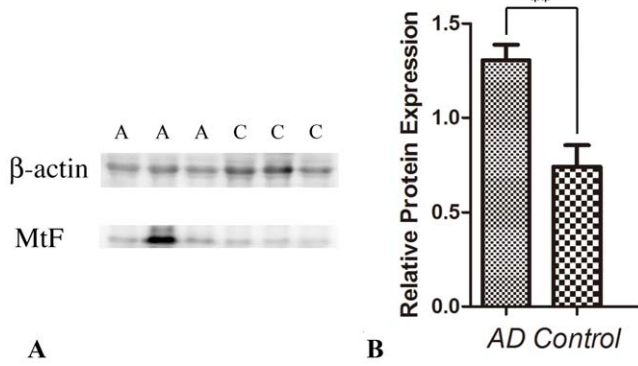

**Figure 5. Western-blot analysis of MtF expression in human brain.** (A) Three AD cases (lanes marked A) and three control cases (lanes marked C) were probed with anti  $\beta$ -actin antibody and anti MtF antibody. (B) When the expression level of MtF is normalized to  $\beta$ -actin, the expression level of MtF in the temporal cortex of AD patients is higher than in control cases (\*\* $p < 0.01$ ). doi:10.1371/journal.pone.0022325.g005

**Discussion**

Using *in situ* hybridization histochemistry, we first demonstrated that MtF mRNA was localized predominantly in neurons in the temporal cortex of the human brain in both control and AD cases. Neuronal localization of MtF mRNA is in accordance with previous reports concerning localization of MtF protein in human

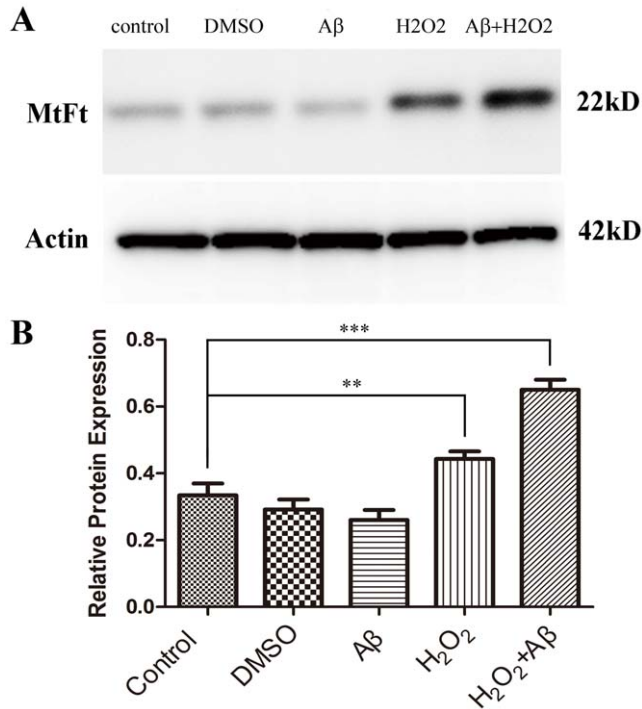

**Figure 6. Western-blot analysis of MtF expression in each *in vitro* experiment group.** (A) An immunoreactive band of approximately 22 kD probed with an anti-MtF antibody is present in all lanes. (B) When the expression level of MtF is normalized to  $\beta$ -actin, MtF expression after treatment with  $H_2O_2$  or with a combination of  $A\beta$  and  $H_2O_2$  was significantly greater than that in control cases (\*\* $p < 0.01$ , \*\*\*  $p < 0.001$ ). However, treatment with  $A\beta$  or DMSO alone shows no significant effect on MtF expression. doi:10.1371/journal.pone.0022325.g006

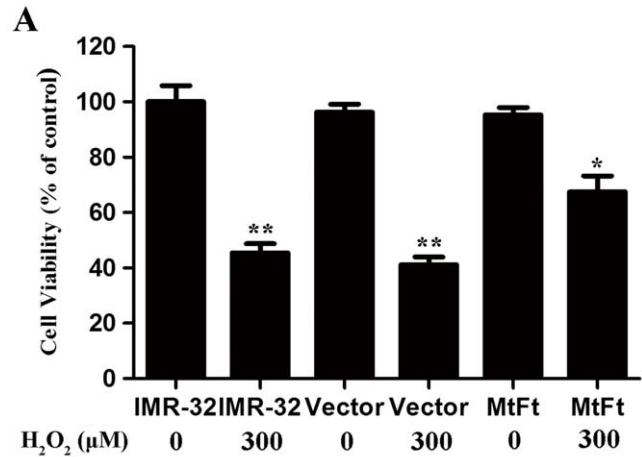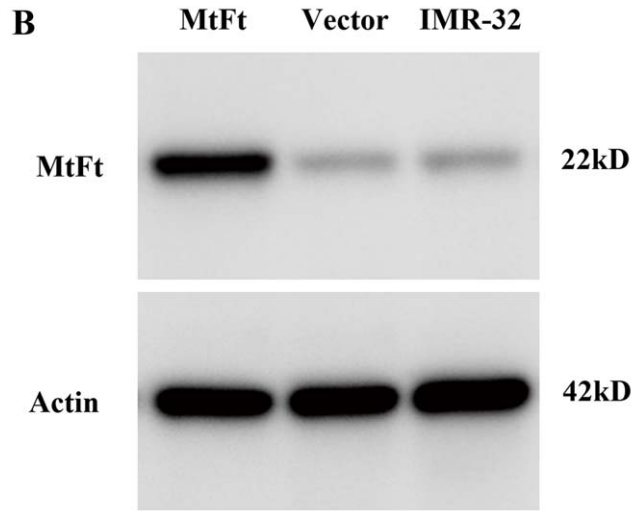

**Figure 7. Effect of MtF expression on cell viability after treatment with  $H_2O_2$ .** An MtF protein band exists with an apparent molecular mass of 22 kDa on SDS-PAGE; weak bands were detected in IMR-32 and vector-IMR-32 cells (B). Wild-type IMR-32 cells, empty vector transfectants (Vector-IMR-32), and MtF transfectants (MtF-IMR-32) were treated with 300  $\mu M$   $H_2O_2$  for 30 min (A). Cell viability was measured by MTT assay. A remarkable decrease in the viability of IMR-32 and Vector-IMR-32 cells (about 50%;  $p < 0.01$ , compared with control groups) was observed after treatment with 300  $\mu M$   $H_2O_2$  for 30 min (A). The viability of MtF-IMR-32 cells under treatment decreased about 30%, however, the cell viability was much higher than in the control group ( $p < 0.05$ ). \*\*  $p < 0.01$  vs. non-treated cells; \*  $p < 0.05$  vs. the  $H_2O_2$ -treated control cells. doi:10.1371/journal.pone.0022325.g007

substantia nigra [22] and mouse brain [20]. Interestingly, we demonstrated that the MtF mRNA signal intensity appeared to be increased in AD brains. In agreement with the *in situ* results, the quantitative PCR and western blot experiments showed that MtF mRNA and protein levels were increased in the temporal cortex of AD brains compared to controls. These results suggest that MtF may be involved in pathological processes in AD. More cases will be investigated in future studies to provide stronger evidence for a role of MtF in the progression of AD.

The cell culture experiments demonstrated that the expression of MtF was not altered by  $A\beta$  neurotoxicity or peroxyinitrite treatment but was increased by  $H_2O_2$  treatment. Peroxyinitrite produces nitric oxide (NO) and can induce oxidative stress. However, treatment with peroxyinitrite did not alter MtF

expression in a similar way to H<sub>2</sub>O<sub>2</sub>. These results suggest that the increase in MtF expression may be specific to H<sub>2</sub>O<sub>2</sub>-induced oxidative stress. H<sub>2</sub>O<sub>2</sub>, a reactive oxygen species, is a by-product of normal cellular function and is produced by superoxide dismutase (SOD) and monoamine oxidase (MAO). Normally, H<sub>2</sub>O<sub>2</sub> is broken down in brain by the actions of glutathione peroxidase and catalase; however, under certain pathophysiological conditions where excessive H<sub>2</sub>O<sub>2</sub> is produced, cellular defenses can be overwhelmed and H<sub>2</sub>O<sub>2</sub> may then provoke oxidative stress [38].

Interestingly, the present study demonstrated that MtF mRNA and protein expression were increased most by the combination of H<sub>2</sub>O<sub>2</sub> and A $\beta$ . However, there were no differences between A $\beta$  treatment and the control group in terms of MtF mRNA and protein expression levels. Several previous studies have suggested a relationship between A $\beta$  and oxidative stress induced by iron. It has been demonstrated that iron can facilitate the aggregation of A $\beta$  and increase its toxicity [39,40]. Iron has also been shown to induce the aggregation of hyperphosphorylated  $\tau$  (tau), the major constituent of neurofibrillary tangles [5] and has been associated with senile plaques and neurofibrillary tangles in human AD brains [1,4,5]. Furthermore, it has been suggested that excessive iron can generate oxidative stress in AD [4,9,10,11,12].

The precise role of MtF in AD still remains unknown. However this and previous studies have raised several possibilities. Since Fe<sup>2+</sup> displays a toxic effect on cells, the increased Fe<sup>2+</sup> in AD brain tissues may be a cause of neuronal damage. In addition, Fe<sup>2+</sup> can enhance the formation of A $\beta$  oligomers and senile plaques [39,40]. Because MtF has high-sequence homology to H-ferritin, including conservation of the ferroxidase center and activity [18], MtF is thought to oxidize the potentially toxic ferrous iron. In addition, MtF can reduce iron concentration in the cytoplasm. MtF has a positively charged leader sequence that provides it with a means to access the mitochondria [38]. Overexpression of MtF can draw

iron from the cytosolic iron pool to the mitochondria and reduce cellular iron concentration [41,42,43]. Based on our *in vitro* results, it is likely that MtF may prevent cell injury and tissue damage, and therefore protect brain integrity, through antioxidant functions.

The neuroprotective effect of MtF is supported by the culture experiments showing that the overexpression of MtF decreased IMR-32 cell death. However, even though there is an endogenous increase in MtF upon incubation with H<sub>2</sub>O<sub>2</sub>, there is no rescue of cell viability in the same cells unless MtF is expressed before H<sub>2</sub>O<sub>2</sub> is added to the cells. This may be because H<sub>2</sub>O<sub>2</sub>-induced cell death occurs before MtF can have its neuroprotective effect. Therefore, it appears that the MtF which is overexpressed before H<sub>2</sub>O<sub>2</sub> addition has a greater protective effect than the endogenous MtF. Further study is needed to clarify this issue.

In summary, the present study has shown that MtF mRNA locates mainly in neurons and its expression is up-regulated in the cortex of AD patients. We have also demonstrated, through *in vitro* experiments, that this increase in MtF expression may be induced by H<sub>2</sub>O<sub>2</sub>-provoked oxidative stress rather than by A $\beta$ . Moreover, MtF overexpression has a neuroprotective effect against oxidative stress induced by H<sub>2</sub>O<sub>2</sub>. These results indicate that MtF may be involved in the pathological process of AD.

## Acknowledgments

We are grateful to the Sun Health Research Institute Brain and Body Donation Program of Sun City, Arizona, for the provision of human brain tissue.

## Author Contributions

Conceived and designed the experiments: IT SZ YK TGB. Performed the experiments: LW HY HS YK TGB EMA NJB IT. Analyzed the data: LW. Contributed reagents/materials/analysis tools: YK TGB. Wrote the paper: LW SZ YK TGB NJB IT.

## References

- LeVine SM (1997) Iron deposits in multiple sclerosis and Alzheimer's disease brains. *Brain Res* 760: 298–303.
- Deibel MA, Ehmann WD, Markesbery WR (1996) Copper, iron, and zinc imbalances in severely degenerated brain regions in Alzheimer's disease: possible relation to oxidative stress. *J Neurol Sci* 143: 137–142.
- Connor JR, Menzies SL, St Martin SM, Mufson EJ (1992) A histochemical study of iron, transferrin, and ferritin in Alzheimer's diseased brains. *J Neurosci Res* 31: 75–83.
- Smith MA, Harris PL, Sayre LM, Perry G (1997) Iron accumulation in Alzheimer disease is a source of redox-generated free radicals. *Proc Natl Acad Sci U S A* 94: 9866–9868.
- Yamamoto A, Shin RW, Hasegawa K, Naiki H, Sato H, et al. (2002) Iron (III) induces aggregation of hyperphosphorylated tau and its reduction to iron (II) reverses the aggregation: implications in the formation of neurofibrillary tangles of Alzheimer's disease. *J Neurochem* 82: 1137–1147.
- Jefferies WA, Food MR, Gabathuler R, Rothenberger S, Yamada T, et al. (1996) Reactive microglia specifically associated with amyloid plaques in Alzheimer's disease brain tissue express melanotransferrin. *Brain Res* 712: 122–126.
- Kawamata T, Tooyama I, Yamada T, Walker DG, McGeer PL (1993) Lactotransferrin immunocytochemistry in Alzheimer and normal human brain. *Am J Pathol* 142: 1574–1585.
- Wang L, Sato H, Zhao S, Tooyama I (2010) Deposition of lactoferrin in fibrillar-type senile plaques in the brains of transgenic mouse models of Alzheimer's disease. *Neurosci Lett* 481: 164–167.
- Castellani RJ, Moreira PI, Liu G, Dobson J, Perry G, et al. (2007) Iron: the Redox-active center of oxidative stress in Alzheimer disease. *Neurochem Res* 32: 1640–1645.
- Altamura S, Muckenthaler MU (2009) Iron toxicity in diseases of aging: Alzheimer's disease, Parkinson's disease and atherosclerosis. *J Alzheimers Dis* 16: 879–895.
- Hirai K, Aliev G, Nunomura A, Fujioka H, Russell RL, et al. (2001) Mitochondrial abnormalities in Alzheimer's disease. *J Neurosci* 21: 3017–3023.
- Kell DB (2010) Towards a unifying, systems biology understanding of large-scale cellular death and destruction caused by poorly liganded iron: Parkinson's, Huntington's, Alzheimer's, prions, bactericides, chemical toxicology and others as examples. *Arch Toxicol* 84: 825–889.
- Ponka P (1997) Tissue-specific regulation of iron metabolism and heme synthesis: distinct control mechanisms in erythroid cells. *Blood* 89: 1–25.
- Napier I, Ponka P, Richardson DR (2005) Iron trafficking in the mitochondrion: novel pathways revealed by disease. *Blood* 105: 1867–1874.
- Arosio P, Levi S (2010) Cytosolic and mitochondrial ferritins in the regulation of cellular iron homeostasis and oxidative damage. *Biochim Biophys Acta* 1800: 783–792.
- Richardson DR, Lane DJ, Becker EM, Huang ML, Whitnall M, et al. (2010) Mitochondrial iron trafficking and the integration of iron metabolism between the mitochondrion and cytosol. *Proc Natl Acad Sci U S A* 107: 10775–10782.
- Levi S, Corsi B, Bosisio M, Invernizzi R, Volz A, et al. (2001) A human mitochondrial ferritin encoded by an intronless gene. *J Biol Chem* 276: 24437–24440.
- Drysdale J, Arosio P, Invernizzi R, Cazzola M, Volz A, et al. (2002) Mitochondrial ferritin: a new player in iron metabolism. *Blood Cells Mol Dis* 29: 376–383.
- Levi S, Arosio P (2004) Mitochondrial ferritin. *Int J Biochem Cell Biol* 36: 1887–1889.
- Santambrogio P, Biasiotto G, Sanvito F, Olivieri S, Arosio P, et al. (2007) Mitochondrial ferritin expression in adult mouse tissues. *J Histochem Cytochem* 55: 1129–1137.
- Pandolfo M, Pastore A (2009) The pathogenesis of Friedreich ataxia and the structure and function of frataxin. *J Neurol* 256 Suppl 1: 9–17.
- Snyder AM, Wang X, Patton SM, Arosio P, Levi S, et al. (2009) Mitochondrial ferritin in the substantia nigra in restless legs syndrome. *J Neuropathol Exp Neurol* 68: 1193–1199.
- Beach TG, Sue LI, Walker DG, Roher AE, Lue L, et al. (2008) The Sun Health Research Institute Brain Donation Program: description and experience, 1987–2007. *Cell Tissue Bank* 9: 229–245.
- Beach TG, Sue LI, Scott S, Sparks DL (1998) Neurofibrillary tangles are constant in aging human nucleus basalis. *Alzheimer's report* 6: 375–380.
- An L, Sato H, Konishi Y, Walker DG, Beach TG, et al. (2009) Expression and localization of lactotransferrin messenger RNA in the cortex of Alzheimer's disease. *Neurosci Lett* 452: 277–280.

26. Tooyama I, Sato H, Yasuhara O, Kimura H, Konishi Y, et al. (2001) Correlation of the expression level of C1q mRNA and the number of C1q-positive plaques in the Alzheimer Disease temporal cortex. analysis of C1q mrna and its protein using adjacent or nearby sections. *Dement Geriatr Cogn Disord* 12: 237–242.
27. Gong Y, Chang L, Viola KL, Lacor PN, Lambert MP, et al. (2003) Alzheimer's disease-affected brain: presence of oligomeric A beta ligands (ADDLs) suggests a molecular basis for reversible memory loss. *Proc Natl Acad Sci U S A* 18: 10417–22.
28. Lambert MP, Barlow AK, Chromy BA, Edwards C, Freed R, et al. (1998) Diffusible, nonfibrillar ligands derived from Abeta1-42 are potent central nervous system neurotoxins. *Proc Natl Acad Sci U S A* 95: 6448–6453.
29. Lacor PN, Buniel MC, Furlow PW, Clemente AS, Velasco PT, et al. (2007) Abeta oligomer-induced aberrations in synapse composition, shape, and density provide a molecular basis for loss of connectivity in Alzheimer's disease. *J Neurosci* 27(4): 796–807.
30. Chromy BA, Nowak RJ, Lambert MP, Viola KL, Chang L, et al. (2003) Self-assembly of Abeta(1–42) into globular neurotoxins. *Biochemistry* 42(44): 12749–60.
31. Lacor PN, Buniel MC, Chang L, Fernandez SJ, Gong Y, et al. (2004) Synaptic targeting by Alzheimer's-related amyloid beta oligomers. *J Neurosci* 24(45): 10191–200.
32. Georganopoulou DG, Chang L, Nam JM, Thaxton CS, Mufson EJ, et al. (2005) Nanoparticle-based detection in cerebral spinal fluid of a soluble pathogenic biomarker for Alzheimer's disease. *Proc Natl Acad Sci U S A* 102(7): 2273–6.
33. Lambert MP, Viola KL, Chromy BA, Chang L, Morgan TE, et al. (2001) Vaccination with soluble Abeta oligomers generates toxicity- neutralizing antibodies. *J Neurochem* 79(3): 595–605.
34. Klein WL (2002) Abeta toxicity in Alzheimer's disease: globular oligomers (ADDLs) as new vaccine and drug targets. *Neurochem Int* 41(5): 345–52.
35. Yanagisawa D, Taguchi H, Yamamoto A, Shirai N, Hirao K, et al. (2011) Curcuminoid binds to amyloid beta (1–42) oligomers and fibril. *J Alzheimers Dis*, in press.
36. Makio Sacki, Yoshinori Kamisaki, Sadaaki Maeda (2000) Involvement of mitogen-activated protein kinase in peroxyntirite-induced cell death of human neuroblastoma SH-SY5Y cells. *Neuroscience Research* 38: 213–216.
37. Halliwell B (1992) Reactive oxygen species and the central nervous system. *J Neurochem* 59: 1609–1623.
38. Bush AI (2003) Copper, zinc, and the metallobiology of Alzheimer disease. *Alzheimer Dis Assoc Disord* 17: 147–150.
39. Duce JA, Bush AI (2010) Biological metals and Alzheimer's disease: implications for therapeutics and diagnostics. *Prog Neurobiol* 92: 1–18.
40. Duce JA, Tsatsanis A, Cater MA, James SA, Robb E, et al. (2010) Iron-export ferroxidase activity of beta-amyloid precursor protein is inhibited by zinc in Alzheimer's disease. *Cell* 142: 857–67.
41. Corsi B, Cozzi A, Arosio P, Drysdale J, Santambrogio P, et al. (2002) Human mitochondrial ferritin expressed in HeLa cells incorporates iron and affects cellular iron metabolism. *J Biol Chem* 277: 22430–22437.
42. Campanella A, Rovelli E, Santambrogio P, Cozzi A, Taroni F, et al. (2009) Mitochondrial ferritin limits oxidative damage regulating mitochondrial iron availability: hypothesis for a protective role in Friedreich ataxia. *Hum Mol Genet* 18: 1–11.
43. Nie G, Sheftel AD, Kim SF, Ponka P (2005) Overexpression of mitochondrial ferritin causes cytosolic iron depletion and changes cellular iron homeostasis. *Blood* 105: 2161–2167.
